# Supplementary material for: Anti-Angiogenic Agent Combined with Anti-PD-1 Immunotherapy Showed Activity in Patients With Classical Hodgkin Lymphoma Who Have Failed Immunotherapy: A Retrospective Case Report Study
Source: Frontiers journal article supplement (doi:10.3389/fimmu.2021.727464), 2021-11-26
Supplement: Table_2.xlsx [file Table_2.xlsx]

## Sheet: file1
Patient ID	Gender（1=M 2=F）	Age（years）	Lines of previous treatment	Previous anti-PD1/PD-L1-based treatment, cycles	Reason for discontinuation of previous immunotherapy	Date of AC therapy initiation	Starting dose of apatinib (mg)	Adverse effect	Adjusted dose of apatinib (mg)	Adverse effect after dose adjustment	Date of AC therapy discontinuation	Cycles of AC therapy	Best response of AC therapy	Disease progression（1=Yes 0=No）	Date of disease progression	Date of death	Date of he last follow-up	Survival state（1=alive 0=dead）	PFS（months）	OS（months）
Case 1	2	33	5	PD -L1 inhibitor, 11	PD	2019-03-13	425	G 3 elevated liver enzymes	250	None	2019-07-04	4	PR	1	2020-01-07		2021-06-12	1	10	27.4
Case 2	2	22	8	PD-1 inhibitor, 1	Grade 3 CIP	2019-03-02	425	G 2 hand-foot syndrome	250	G 1 CIP, G 1 hypothyroidism, G1 hand-foot syndrome	2021-06-12	31	CR	1	2021-06-12		2021-06-12	1	27.7667	27.7667
Case 3	1	40	4	PD-1 inhibitor, 29	PD	2019-03-02	425	G 2 rash	250	G 1 rash	2019-04-24	2	SD	1	2020-10-28		2021-06-12	1	2	27.7667
Case 4	1	40	3	PD-1 inhibitor, 18	PD	2019-04-16	250	None	250	None	2019-08-01	4	PR	1	2019-10-05	2020-03-10	2020-03-10	0	5.73333	10.9667
Case 5	1	75	3	PD-L1 inhibitor, 12	PD	2019-09-04	250	G 3 hypertension, grade 1 fatigue and anorexia	250	None		22	CR	0	2021-06-12		2021-06-12	1	21.5667	21.5667
Case 6	2	25	4	PD-1 inhibitor, 11	Grade 3 CIP	2019-03-13	250	G 1 hypothyroidism	250	G 1 hypothyroidism, G 2 CIP	2020-08-23	14	PR	1	2020-12-15		2021-06-12	1	21.4333	27.4
Case 7	1	40	5	PD-L1 inhibitor, 8; PD-1 inhibitor, 4	PD	2020-03-24	250	G 1 hand-foot syndrome	250	G 1 hand-foot syndrome	2020-08-21	4	PR	1	2020-08-21		2021-06-12	1	5	14.8333
